# Supplementary material for: Patients Satisfied with Care Report Better Quality of Life and Self-Rated Health—Cross-Sectional Findings Based on Hospital Quality Data
Source: MDPI journal article supplement (doi:10.3390/healthcare11050775), 2023-03-06
Supplement: s1 [file s1]

## Supplementary

Figure S1 Directed acyclic graph to identify underlying confounding variables in the associations between inpatients satisfaction with care and quality of life as well as self-rated health

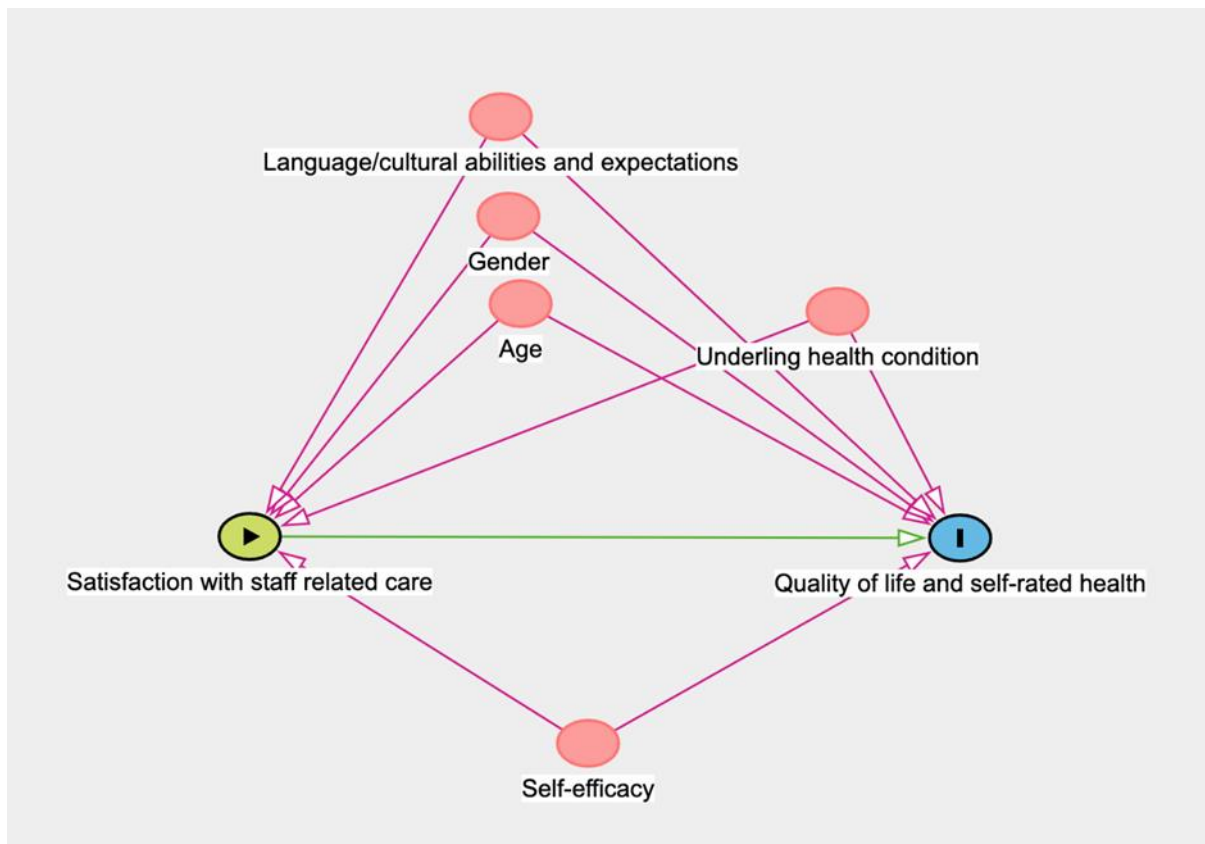

Table S1 Multiple linear regression on satisfaction with physician-related care and quality of life with adjustments for age, gender, mother tongue, and treating ward.

|                                                                                         | Estimate | Robust Standard Error | P-value |
|-----------------------------------------------------------------------------------------|----------|-----------------------|---------|
| <b>Intercept</b>                                                                        | 2.32     | 0.12                  | <0.001  |
| <b>Satisfaction with physician-related care</b>                                         | 0.16     | 0.01                  | <0.001  |
| <b>Treating ward (ref. eyes. otorhinolaryngology and maxillofacial or oral surgery)</b> |          |                       |         |
| internal medicine                                                                       | -0.20    | 0.06                  | <0.001  |
| gynecology and obstetrics                                                               | 0.12     | 0.06                  | 0.081   |
| urology including urological oncology                                                   | -0.06    | 0.04                  | 0.174   |
| oncology                                                                                | -0.25    | 0.05                  | <0.001  |
| cardiology, heart, and vascular surgery                                                 | -0.07    | 0.04                  | 0.085   |
| neurology und neurosurgery                                                              | -0.25    | 0.05                  | <0.001  |
| general and trauma surgery                                                              | -0.18    | 0.05                  | <0.001  |
| dermatology                                                                             | -0.27    | 0.11                  | 0.007   |
| others                                                                                  | -0.28    | 0.06                  | <0.001  |
| <b>Age group (ref. &lt;20 years)</b>                                                    |          |                       |         |
| 21 - 40 years                                                                           | -0.11    | 0.09                  | 0.230   |
| 41 - 60 years                                                                           | -0.33    | 0.08                  | <0.001  |

|                                    |       |      |        |
|------------------------------------|-------|------|--------|
| 61 - 80 years                      | -0.44 | 0.08 | <0.001 |
| > 80 years                         | -0.69 | 0.10 | <0.001 |
| <b>Gender (ref. female)</b>        |       |      |        |
| male                               | 0.08  | 0.03 | 0.003  |
| diverse                            | 0.29  | 0.27 | 0.245  |
| <b>Mother tongue (ref. German)</b> |       |      |        |
| Other mother tongue                | 0.08  | 0.05 | 0.121  |

Table S2 Multiple linear regression on satisfaction with physician-related care and self-rated health with adjustments for age, gender, mother tongue, and treating ward.

|                                                                                         | Estimate | Robust Standard Error | P-value |
|-----------------------------------------------------------------------------------------|----------|-----------------------|---------|
| <b>Intercept</b>                                                                        | 1.87     | 0.12                  | <0.001  |
| <b>Satisfaction with physician-related care</b>                                         | 0.16     | 0.01                  | <0.001  |
| <b>Treating ward (ref. eyes, otorhinolaryngology and maxillofacial or oral surgery)</b> |          |                       |         |
| internal medicine                                                                       | -0.24    | 0.06                  | <0.001  |
| gynecology and obstetrics                                                               | 0.06     | 0.06                  | 0.332   |
| urology including urological oncology                                                   | 0.06     | 0.04                  | 0.134   |
| oncology                                                                                | -0.17    | 0.05                  | <0.001  |
| cardiology, heart, and vascular surgery                                                 | -0.02    | 0.04                  | 0.612   |
| neurology und neurosurgery                                                              | -0.19    | 0.04                  | <0.001  |
| general and trauma surgery                                                              | -0.14    | 0.05                  | 0.003   |
| dermatology                                                                             | -0.34    | 0.09                  | <0.001  |
| others                                                                                  | -0.16    | 0.06                  | 0.007   |
| <b>Age group (ref. &lt;20 years)</b>                                                    |          |                       |         |
| 21 - 40 years                                                                           | 0.03     | 0.09                  | 0.684   |
| 41 - 60 years                                                                           | -0.22    | 0.09                  | 0.008   |
| 61 - 80 years                                                                           | -0.31    | 0.09                  | <0.001  |
| > 80 years                                                                              | -0.50    | 0.11                  | <0.001  |
| <b>Gender (ref. female)</b>                                                             |          |                       |         |
| male                                                                                    | 0.11     | 0.03                  | <0.001  |
| diverse                                                                                 | 0.22     | 0.24                  | 0.363   |
| <b>Mother tongue (ref. German)</b>                                                      |          |                       |         |
| Other mother tongue                                                                     | 0.17     | 0.05                  | <0.001  |

Table S3 Multiple linear regression on satisfaction with nurse-related care and quality of life with adjustments for age, gender, mother tongue, and treating ward.

|                                                                                         | <b>Estimate</b> | <b>Robust Standard Error</b> | <b>P-value</b> |
|-----------------------------------------------------------------------------------------|-----------------|------------------------------|----------------|
| <b>Intercept</b>                                                                        | 2.48            | 0.14                         | <0.001         |
| <b>Satisfaction with nurse-related care</b>                                             | 0.13            | 0.01                         | <0.001         |
| <b>Treating ward (ref. eyes. otorhinolaryngology and maxillofacial or oral surgery)</b> |                 |                              |                |
| internal medicine                                                                       | -0.21           | 0.06                         | <0.001         |
| gynecology and obstetrics                                                               | 0.12            | 0.07                         | 0.069          |
| urology including urological oncology                                                   | -0.04           | 0.04                         | 0.304          |
| oncology                                                                                | -0.26           | 0.05                         | <0.001         |
| cardiology, heart, and vascular surgery                                                 | -0.09           | 0.04                         | 0.037          |
| neurology und neurosurgery                                                              | -0.27           | 0.05                         | <0.001         |
| general and trauma surgery                                                              | -0.20           | 0.05                         | <0.001         |
| dermatology                                                                             | -0.28           | 0.11                         | 0.005          |
| others                                                                                  | -0.31           | 0.07                         | <0.001         |
| <b>Age group (ref. &lt;20 years)</b>                                                    |                 |                              |                |
| 21 - 40 years                                                                           | -0.11           | 0.09                         | 0.228          |
| 41 - 60 years                                                                           | -0.33           | 0.09                         | <0.001         |
| 61 - 80 years                                                                           | -0.41           | 0.09                         | <0.001         |
| > 80 years                                                                              | -0.68           | 0.10                         | <0.001         |
| <b>Gender (ref. female)</b>                                                             |                 |                              |                |
| male                                                                                    | 0.08            | 0.03                         | 0.003          |
| diverse                                                                                 | 0.16            | 0.28                         | 0.524          |
| <b>Mother tongue (ref. German)</b>                                                      |                 |                              |                |
| Other mother tongue                                                                     | 0.09            | 0.05                         | 0.073          |

Table S4 Multiple linear regression on satisfaction with nurse-related and care self-rated health with adjustments for age, gender, mother tongue, and treating ward.

|                                                                                         | <b>Estimate</b> | <b>Robust Standard Error</b> | <b>P-value</b> |
|-----------------------------------------------------------------------------------------|-----------------|------------------------------|----------------|
| <b>Intercept</b>                                                                        | 2.06            | 0.14                         | <0.001         |
| <b>Satisfaction with nurse-related care</b>                                             | 0.14            | 0.01                         | <0.001         |
| <b>Treating ward (ref. eyes. otorhinolaryngology and maxillofacial or oral surgery)</b> |                 |                              |                |
| internal medicine                                                                       | -0.25           | 0.05                         | <0.001         |
| gynecology and obstetrics                                                               | 0.07            | 0.07                         | 0.287          |
| urology including urological oncology                                                   | 0.07            | 0.04                         | 0.067          |
| oncology                                                                                | -0.18           | 0.05                         | <0.001         |
| cardiology, heart, and vascular surgery                                                 | -0.04           | 0.04                         | 0.355          |
| neurology und neurosurgery                                                              | -0.22           | 0.04                         | <0.001         |
| general and trauma surgery                                                              | -0.16           | 0.05                         | 0.001          |
| dermatology                                                                             | -0.36           | 0.09                         | <0.001         |
| others                                                                                  | -0.19           | 0.06                         | 0.002          |
| <b>Age group (ref. &lt;20 years)</b>                                                    |                 |                              |                |
| 21 - 40 years                                                                           | 0.03            | 0.10                         | 0.717          |
| 41 - 60 years                                                                           | -0.21           | 0.09                         | 0.012          |
| 61 - 80 years                                                                           | -0.28           | 0.09                         | <0.001         |
| > 80 years                                                                              | -0.48           | 0.11                         | <0.001         |
| <b>Gender (ref. female)</b>                                                             |                 |                              |                |
| male                                                                                    | 0.11            | 0.03                         | <0.001         |
| diverse                                                                                 | 0.08            | 0.26                         | 0.751          |
| <b>Mother tongue (ref. German)</b>                                                      |                 |                              |                |
| Other mother tongue                                                                     | 0.19            | 0.05                         | <0.001         |
